# Supplementary material for: A light-up near-infrared probe with aggregation-induced emission characteristics for highly sensitive detection of alkaline phosphatase
Source: Royal Society of Chemistry journal article supplement (doi:10.1039/c9an01505a), 2019-01-01
Supplement: c9an01505a1.pdf [file c9an01505a1.pdf]

## Supporting Information

# **A Light-up Near-infrared Probe with Aggregation-induced Emission Characteristics for Highly Sensitive Detection of Alkaline Phosphatase**

Meng Zhao,<sup>†</sup> Yinjia Gao,<sup>†</sup> Shuyue Ye,<sup>†</sup> Jianan Ding,<sup>†</sup> Anna Wang,<sup>†</sup> Pengjie Li,<sup>‡</sup> Haibin Shi<sup>\*,†</sup>

<sup>†</sup>State Key Laboratory of Radiation Medicine and Protection, School for Radiological and Interdisciplinary Sciences (RAD-X) and Collaborative Innovation Center of Radiation Medicine of Jiangsu Higher Education Institutions, Soochow University, Suzhou 215123, P. R. China

<sup>‡</sup> Department of Urology, The Second People's Hospital of Shanxi Province, Taiyuan 030012, P. R. China.

\*Corresponding author: [hbshi@suda.edu.cn](mailto:hbshi@suda.edu.cn)

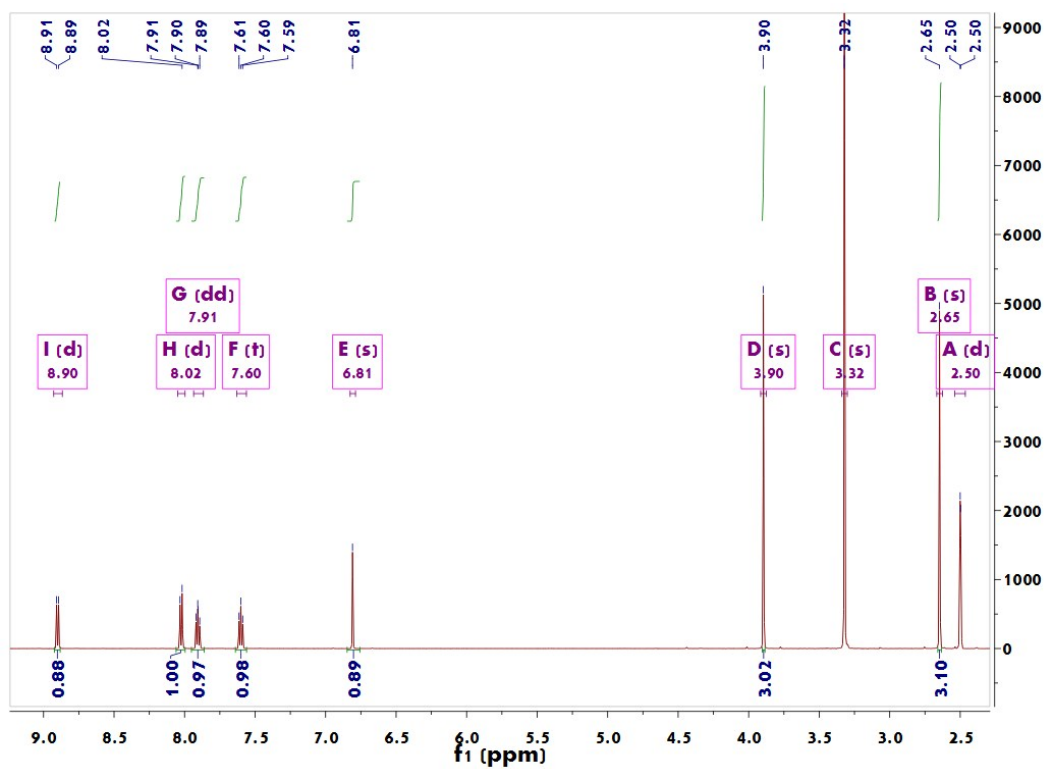

Fig. S1 <sup>1</sup>H-NMR spectrum of Q2.

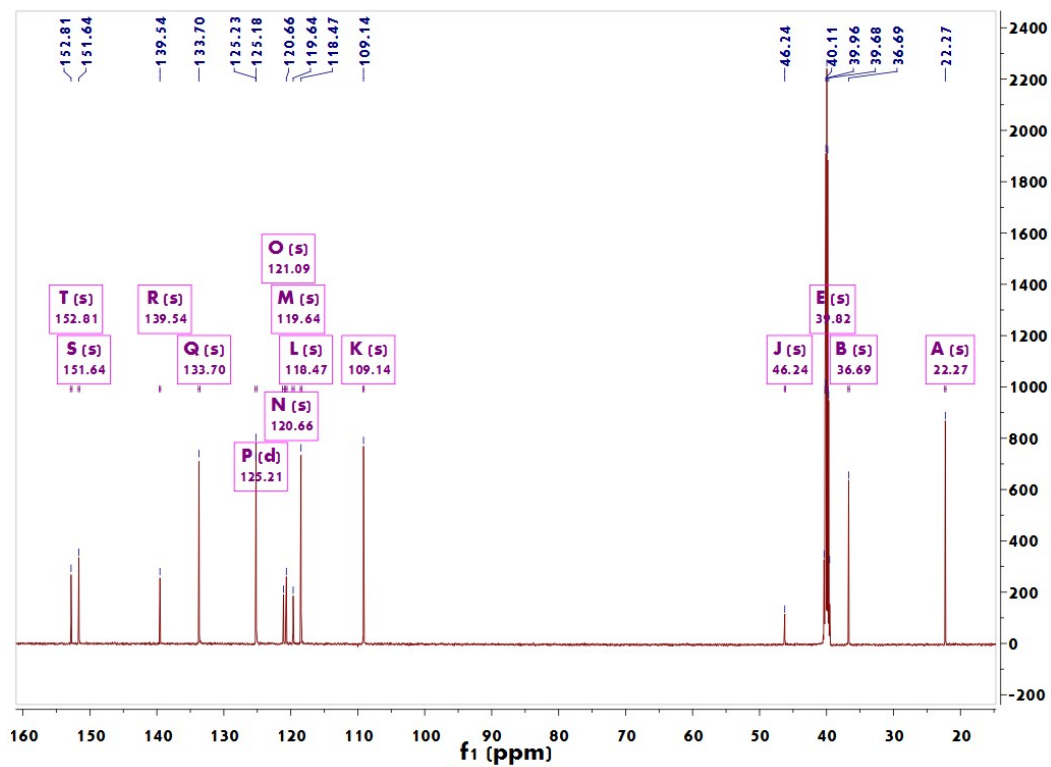

Fig. S2 <sup>13</sup>C-NMR spectrum of Q2.

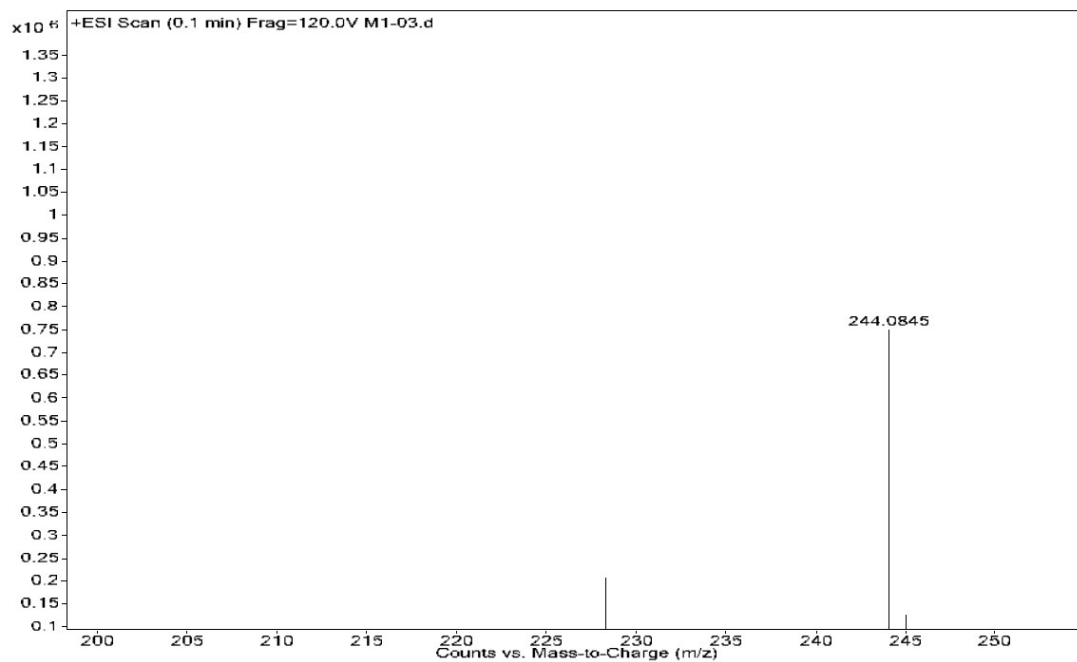

Fig. S3 High resolution mass spectrometry of Q2.

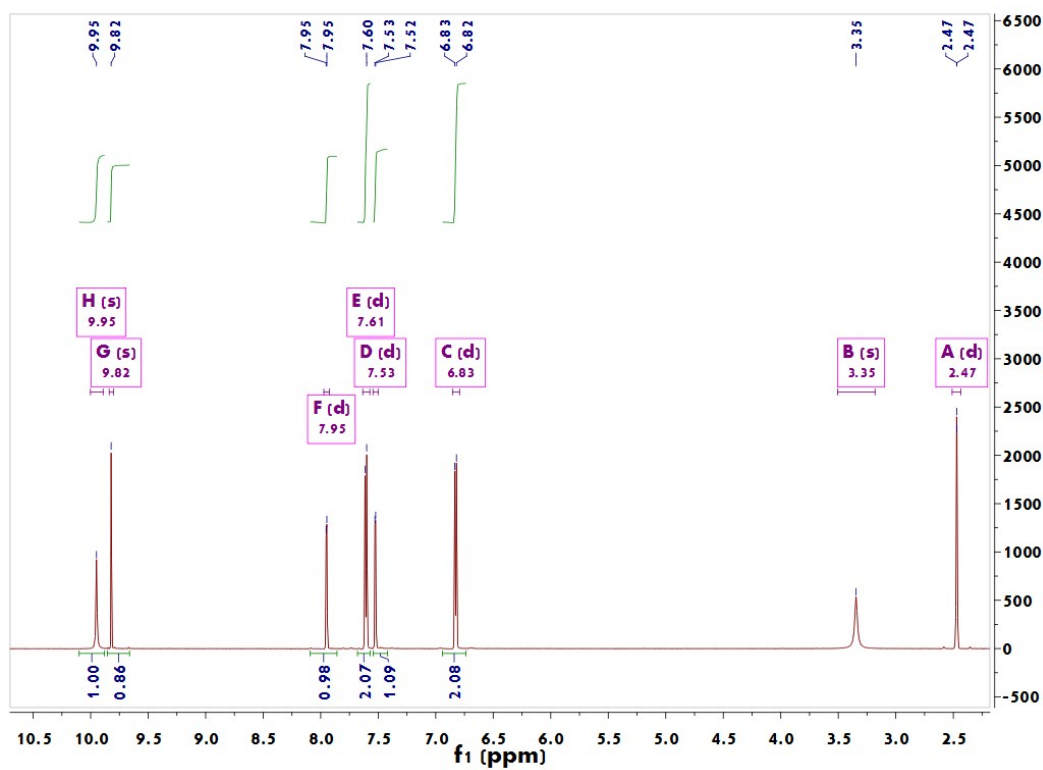

Fig. S4 <sup>1</sup>H-NMR spectrum of T1.

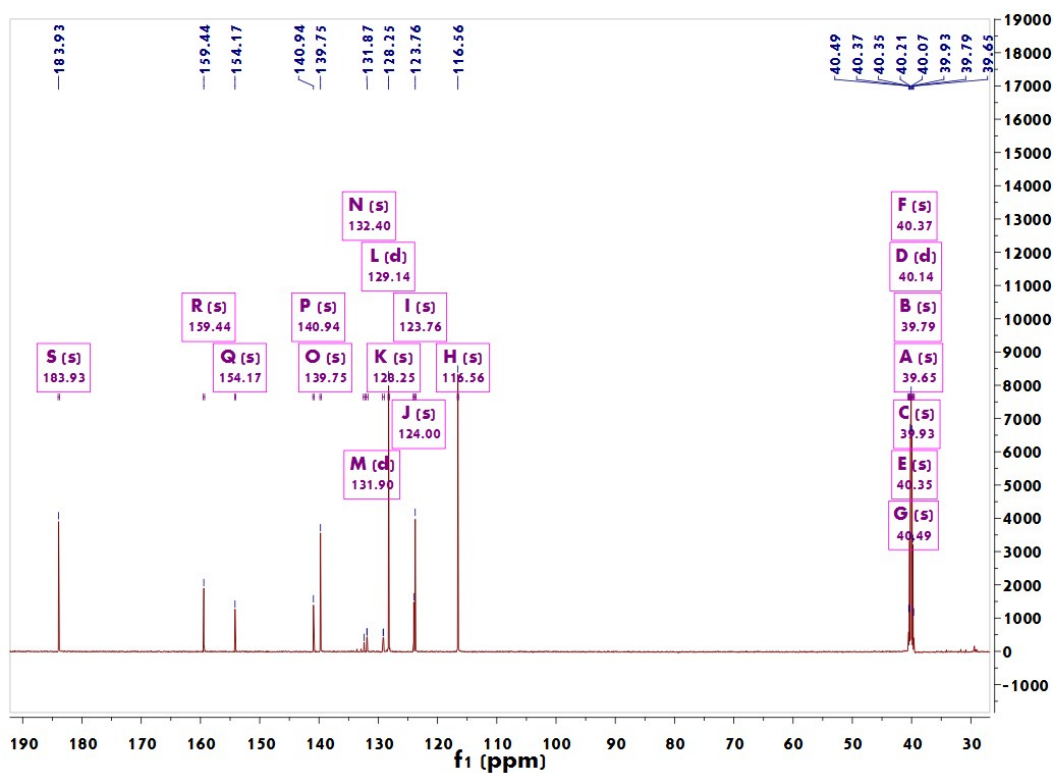

Fig. S5  $^{13}\text{C}$ -NMR spectrum of T1.

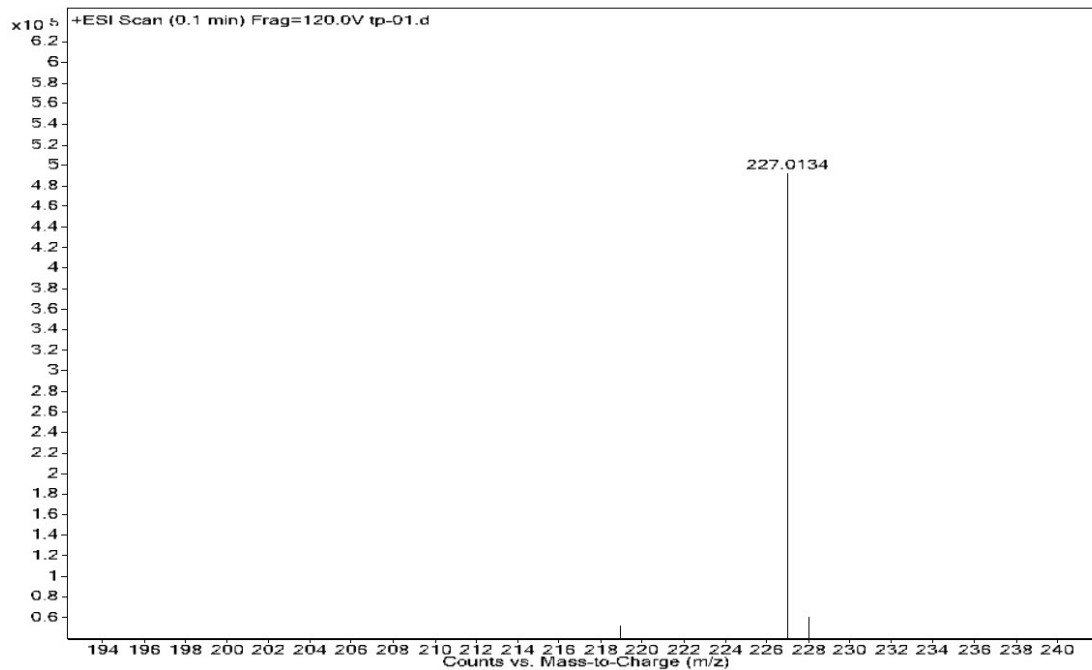

Fig. S6 High resolution mass spectrometry of T1.

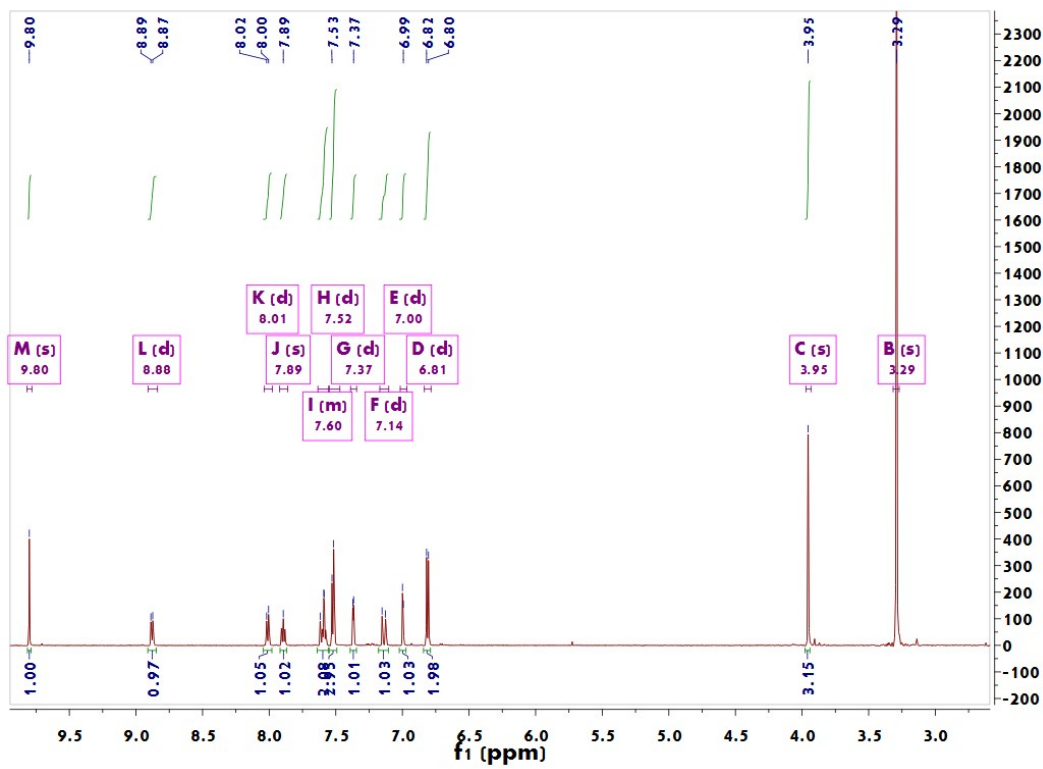

Fig. S7 <sup>1</sup>H-NMR spectrum of QMT.

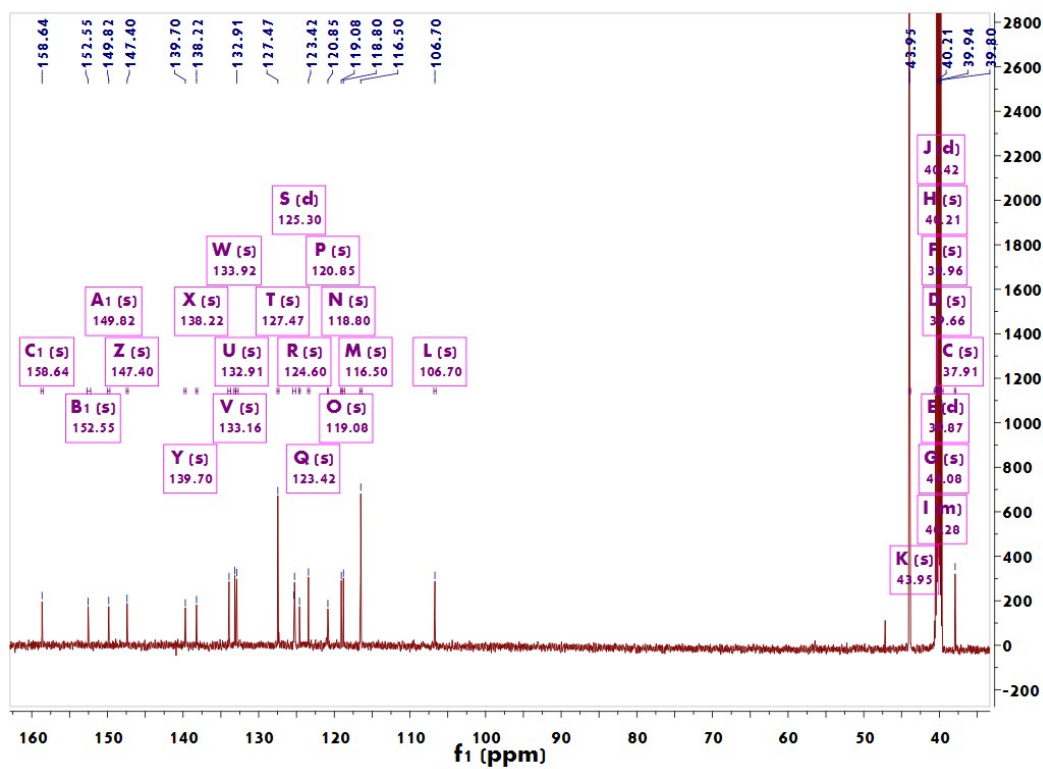

Fig. S8  $^{13}\text{C}$ -NMR spectrum of QMT.

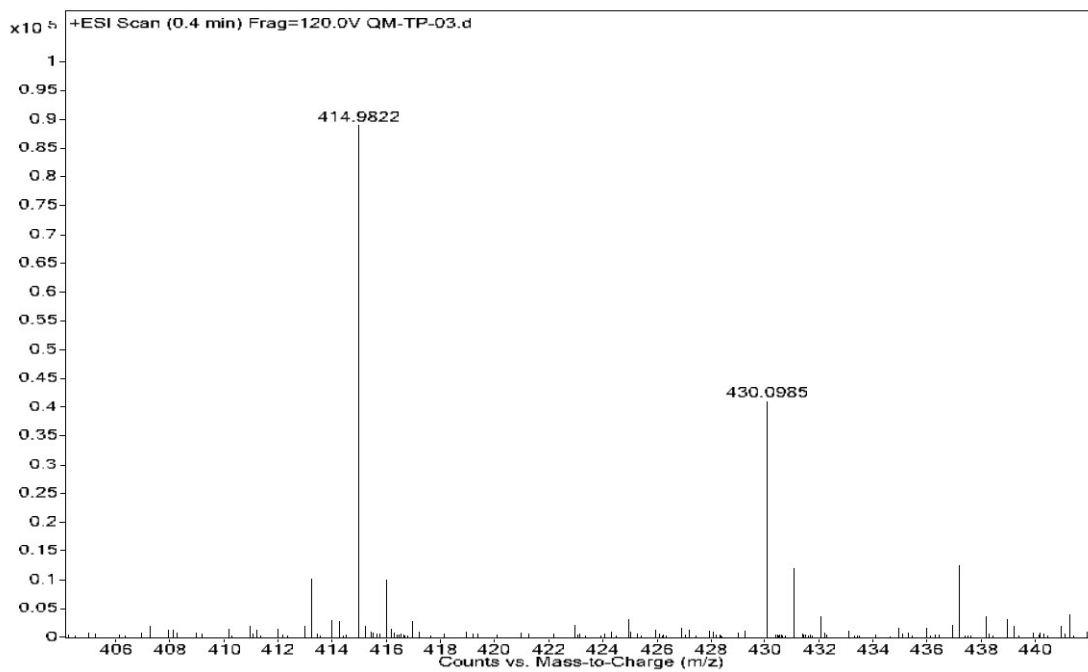

Fig. S9 High resolution mass spectrometry of QMT.

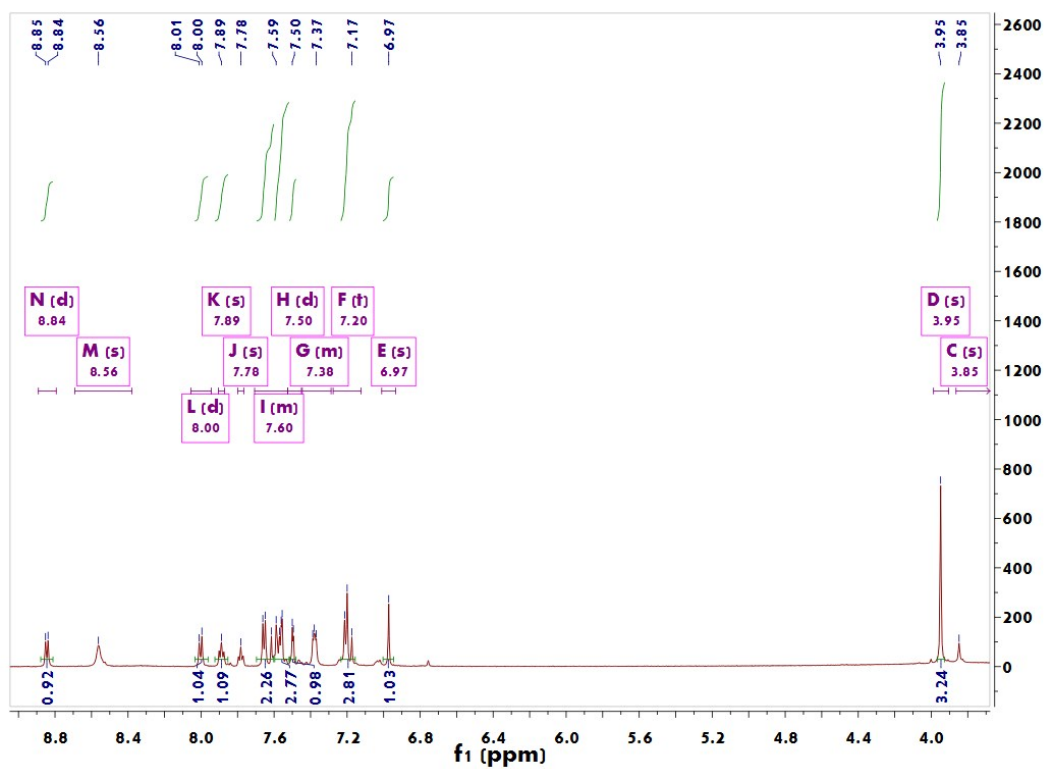

Fig. S10 <sup>1</sup>H-NMR spectrum of QMTP.

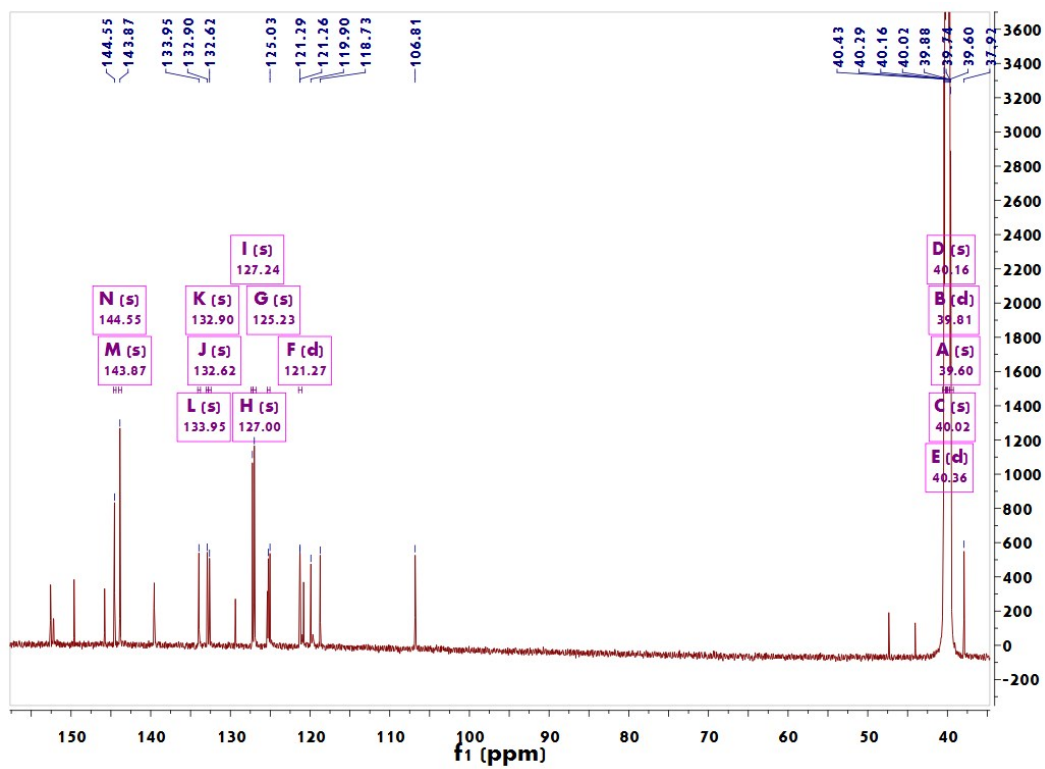

Fig. S11 <sup>13</sup>C-NMR spectrum of QMTP.

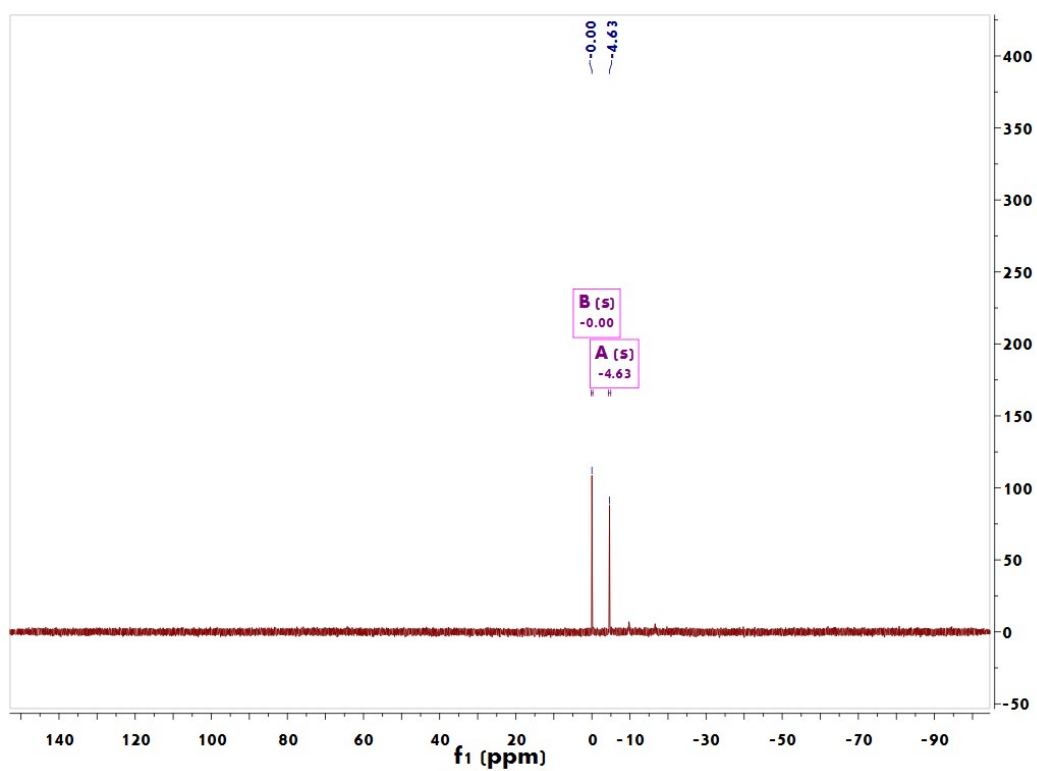

Fig. S12  $^{31}\text{P}$ -NMR spectrum of QMTP.

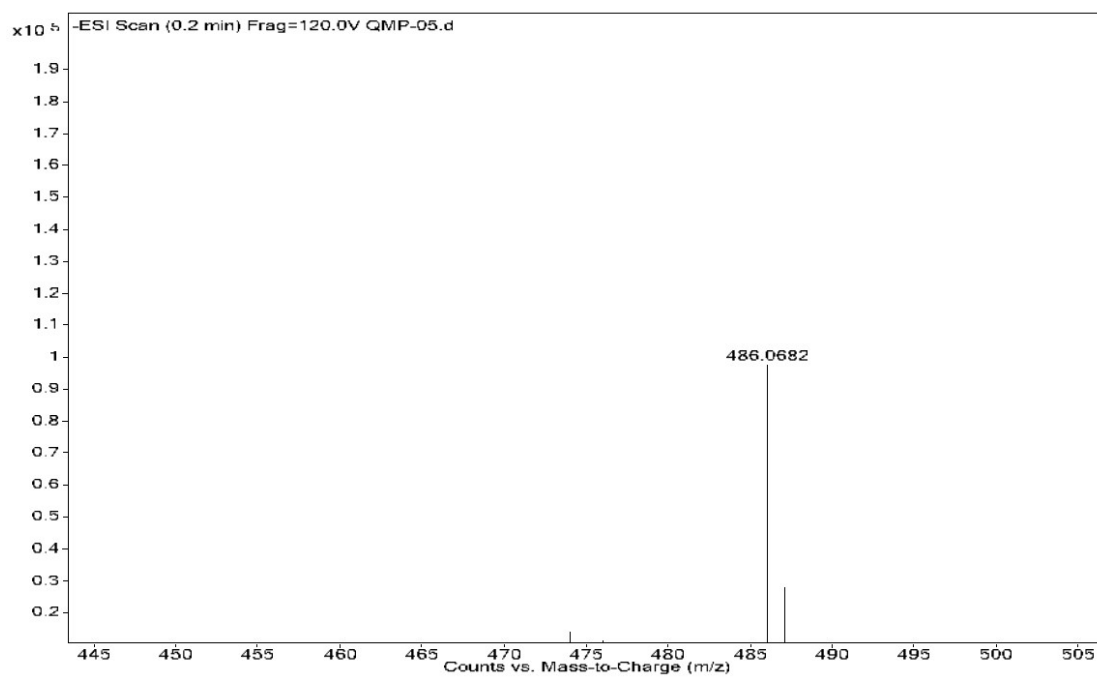

Fig. S13 High resolution mass spectrometry of QMTP.



**Table S1** Fluorescence quantum yields of QMT and QMTP in water or DMSO, the reference is rhodamine B.

| QY( $\Phi$ )     | QMT  | QMTP  |
|------------------|------|-------|
| H <sub>2</sub> O | 0.28 | 0.026 |
| DMSO             | 0.01 | 0.031 |

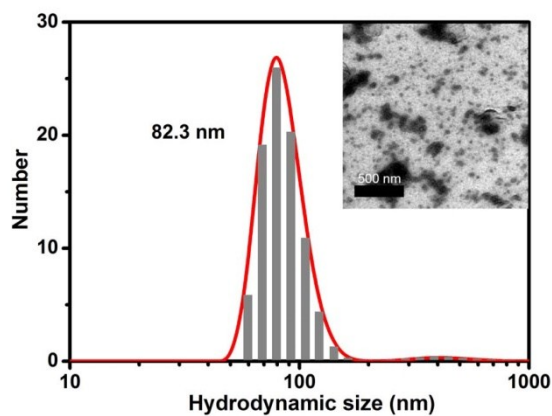

**Fig. S14** The hydrodynamic size of QMT. The inset is TEM image. Scale bar: 500 nm.

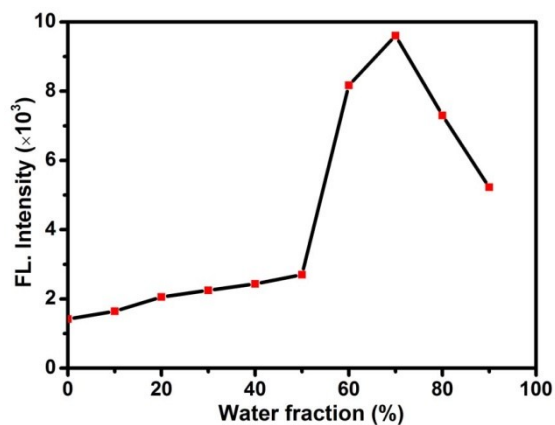

**Fig. S15** Plot of fluorescence intensity versus the solvent composition of the DMSO/Water mixture of QMT.

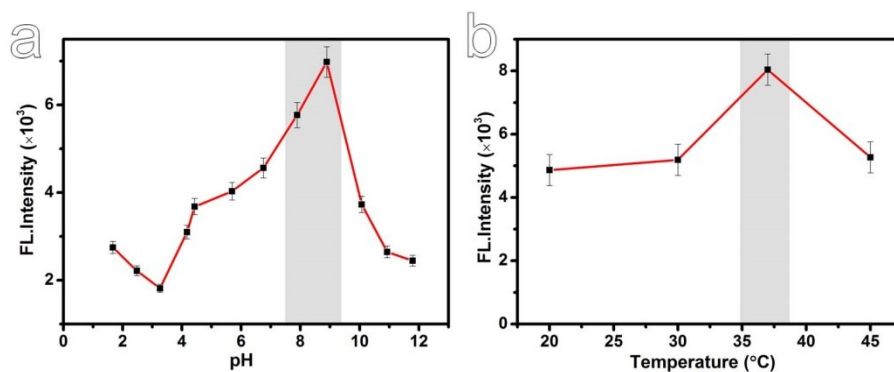

**Fig. S16** Effects of pH (a) and temperature (b) on the fluorescence of QMTP (5 μM) with 2000 U L<sup>-1</sup> ALP in Tris-HCl buffer.

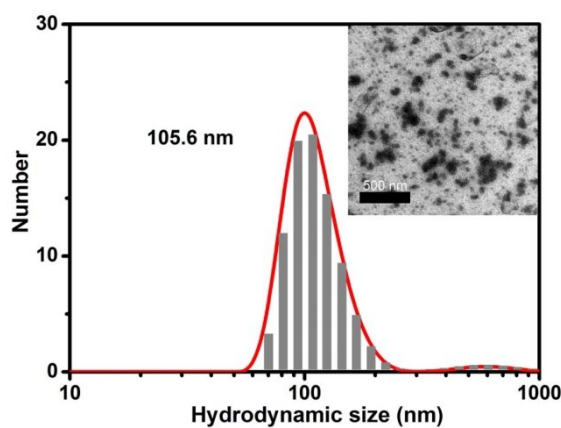

**Fig. S17** The hydrodynamic size of QMTP treated with the ALP (2000 U L<sup>-1</sup>). The inset is TEM image. Scale bar: 500 nm.

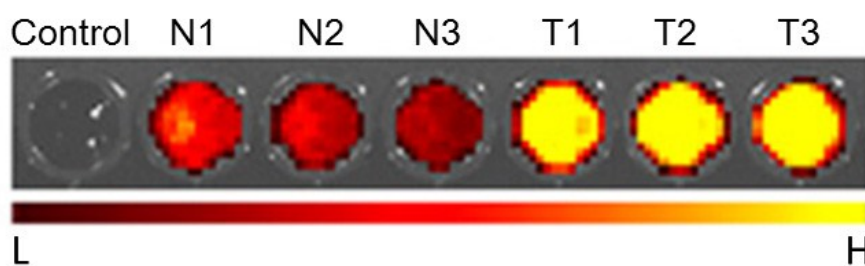

**Fig. S18** The fluorescence images of the QMTP (5 μM) recorded after incubated with 10 μL serum of healthy BALB/c (N1-N3) mice and 4T1 tumor-bearing mice (T1-T3) for 1 h at 37 °C in Tris-HCl buffer on an IVIS system ( $\lambda_{\text{ex}} = 465 \text{ nm}$  and  $\lambda_{\text{em}} = 640 \text{ nm}$ ).

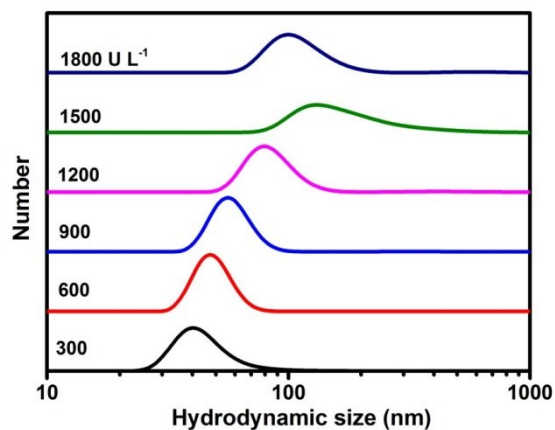

**Fig. S19** The hydrodynamic size of QMTP ( $5 \mu\text{M}$ ) treated with different concentrations of ALP ( $300\text{-}1800 \text{ U L}^{-1}$ ).

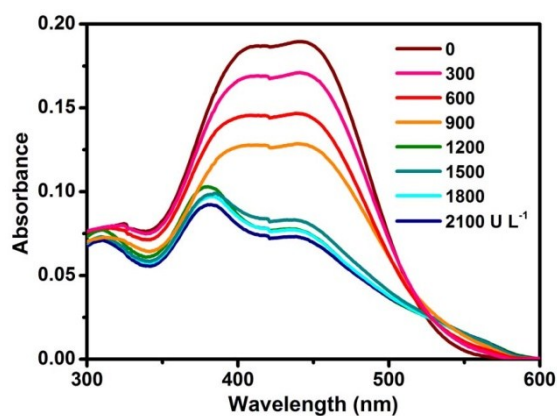

**Fig. S20** Changes of absorption spectra of probe QMTP with the different concentrations of ALP in Tris-HCl buffer.

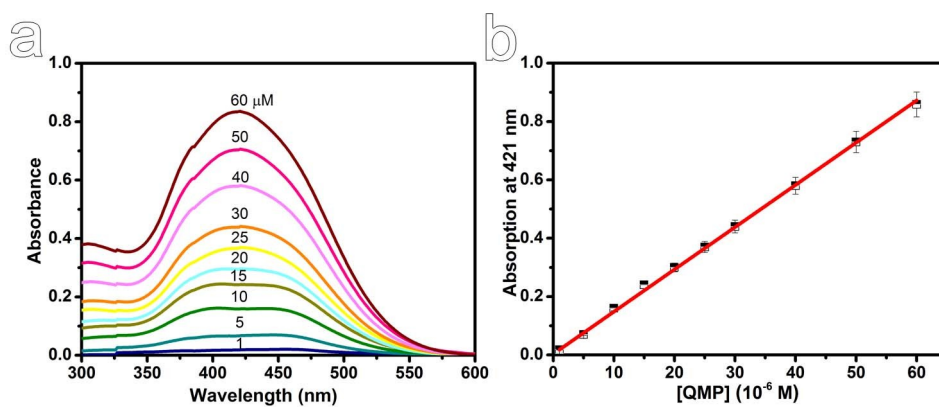

**Fig. S21** Absorption spectra (a) and plot of intensity (b) against the concentration of QMTP in H<sub>2</sub>O.

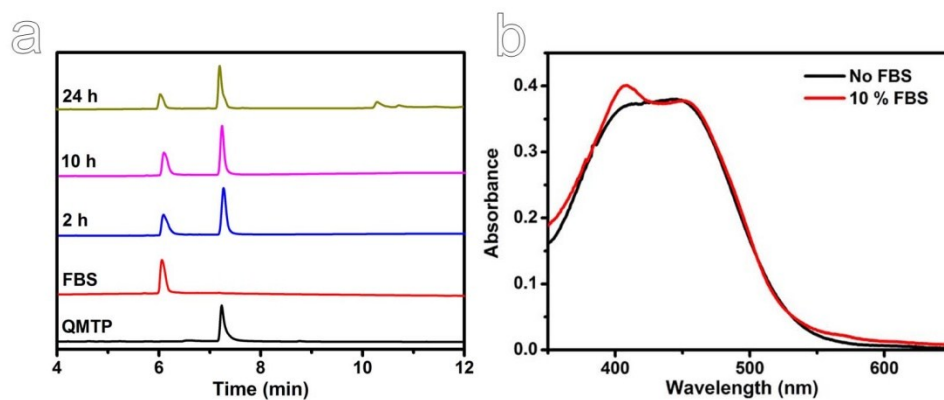

**Fig. S22** (a) HPLC profiles of QMTP, FBS and QMTP treated with FBS for different time periods at 37 °C. (b) Absorption spectra of QMTP in Tris-HCl buffer with or without containing 10 % FBS.

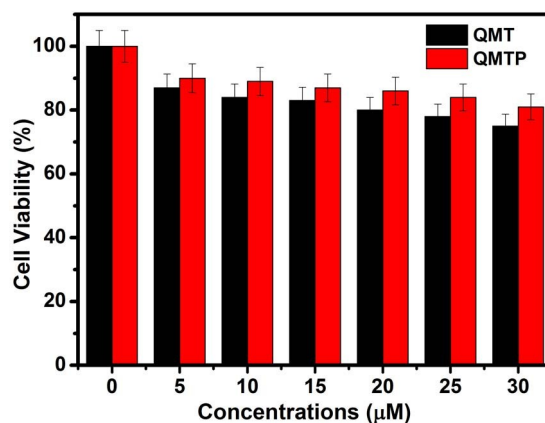

**Fig. S23** MTT assays on the viability of HeLa cells after incubated with the different concentrations probes QMT and QMTP, i.e., 0, 5, 10, 15, 20, 25, and 30 μM (the error bars represent standard deviations of six parallel measurements).

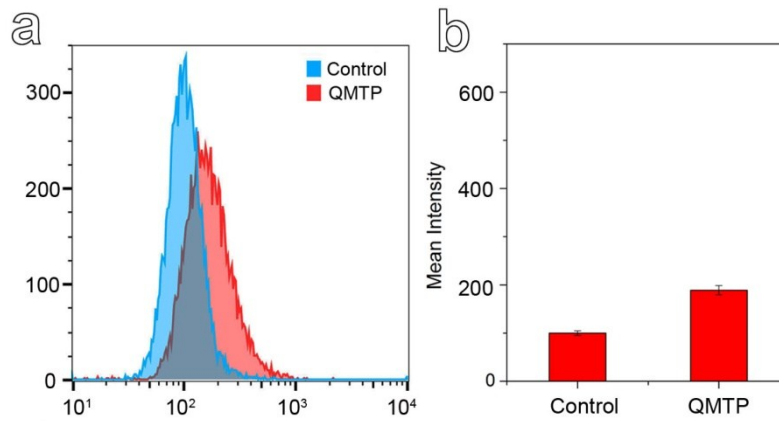

**Fig. S24** Flow cytometry analysis of the QMTP incubated in regular medium and ALP inhibitor  $\text{Na}_3\text{VO}_4$  pretreated medium for 3T3 cells.

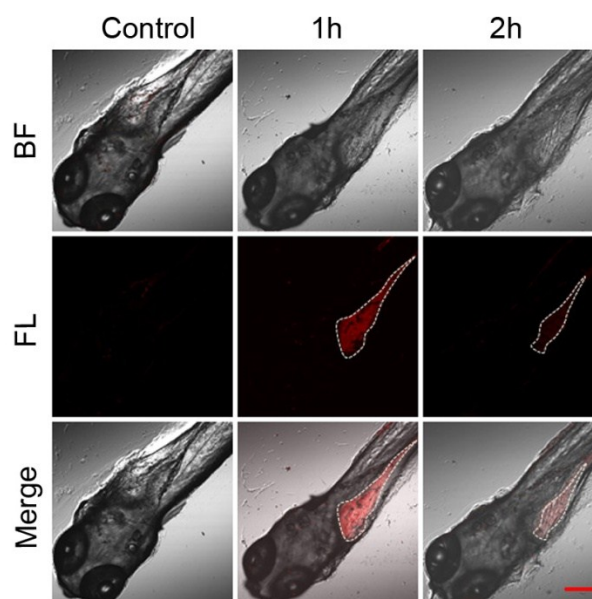

**Fig. S25** *In vivo* fluorescence imaging of zebrafish larvae pre-treated with 0.5 mM of APAP posterior to the administration of QMTP probe for 0 h (control), 1 h or 2 h, collected at 600-680 nm and excited at 488 nm. BF: bright field; FL: fluorescence. Scale bar: 200  $\mu\text{m}$ .
